# Supplementary material for: Emerging Southeast Asian PfCRT mutations confer Plasmodium falciparum resistance to the first-line antimalarial piperaquine
Source: PubMed Central journal article supplement (PMC6095916; doi:10.1038/s41467-018-05652-0), 2018-08-17
Supplement: 41467_2018_5652_MOESM1_ESM.pdf [file 41467_2018_5652_MOESM1_ESM.pdf]

## Supplementary Information

### Emerging Southeast Asian PfCRT mutations confer *Plasmodium falciparum* resistance to the first-line antimalarial piperazine

Leila S. Ross, Satish K. Dhingra, Sachel Mok, Tomas Yeo, Kathryn J. Wicht, Krittikorn Kumpornsin, Shannon Takala-Harrison, Benoit Witkowski, Rick M. Fairhurst, Fred Arie, Didier Menard, David A. Fidock

Supplementary Figure 1 | Chemical structures of antimalarial compounds used in this study.

Supplementary Figure 2 | Year of sampling of *P. falciparum* isolates of Asian origin, included in the *pfcr* sequence analysis of the Pf3K release 3 genome data plus a more recent deposit of 87 genomes from Cambodia.

Supplementary Figure 3 | Zinc-Finger Nuclease (ZFN)-mediated editing of the *pfcr* gene.

Supplementary Table 1 | Frequency distribution of PfCRT haplotypes from the Pf3K dataset across Asia.

Supplementary Table 2 | PfCRT haplotypes from the Pf3K dataset in Southeast Asia.

Supplementary Table 3 | Western Cambodian PfCRT haplotypes over time and K13 status.

Supplementary Table 4 | PSA<sub>0-3h</sub> Results.

Supplementary Table 5 | Piperazine IC<sub>50</sub> and IC<sub>90</sub> values and associated statistics.

Supplementary Table 6 | [<sup>3</sup>H]-Piperazine cellular accumulation ratios.

Supplementary Table 7 | Chloroquine and monodesethyl-chloroquine IC<sub>50</sub> values and associated statistics.

Supplementary Table 8 | Monodesethyl-amodiaquine and quinine IC<sub>50</sub> values and associated statistics.

Supplementary Table 9 | Mefloquine and lumefantrine IC<sub>50</sub> values and associated statistics.

Supplementary Table 10 | Dihydroartemisinin IC<sub>50</sub> values and associated statistics.

Supplementary Table 11 | Verapamil reversibility of chloroquine and piperazine IC<sub>50</sub> values.

Supplementary Table 12 | Raw fitness data from co-culture experiments.

Supplementary Table 13 | *pfpm2* copy number and RNA expression analysis.

Supplementary Table 14 | List of oligonucleotides used in this study.

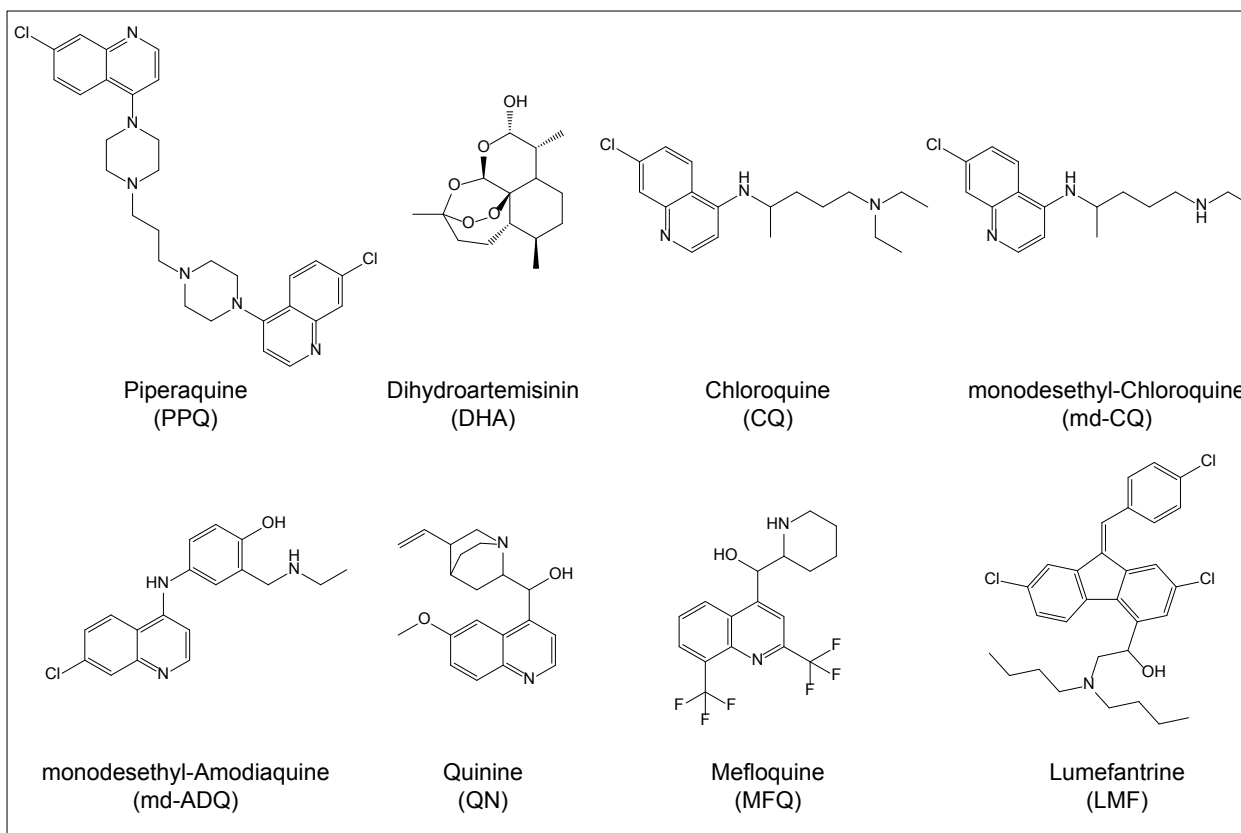

**Supplementary Figure 1 | Chemical structures of compounds used in this study.** These compounds represent current (PPQ, DHA, ADQ, MFQ, LMF) and prior (CQ, QN) first-line drugs used for the treatment of *P. falciparum* malaria. md-CQ and md-ADQ are the active metabolites of CQ and ADQ, respectively.

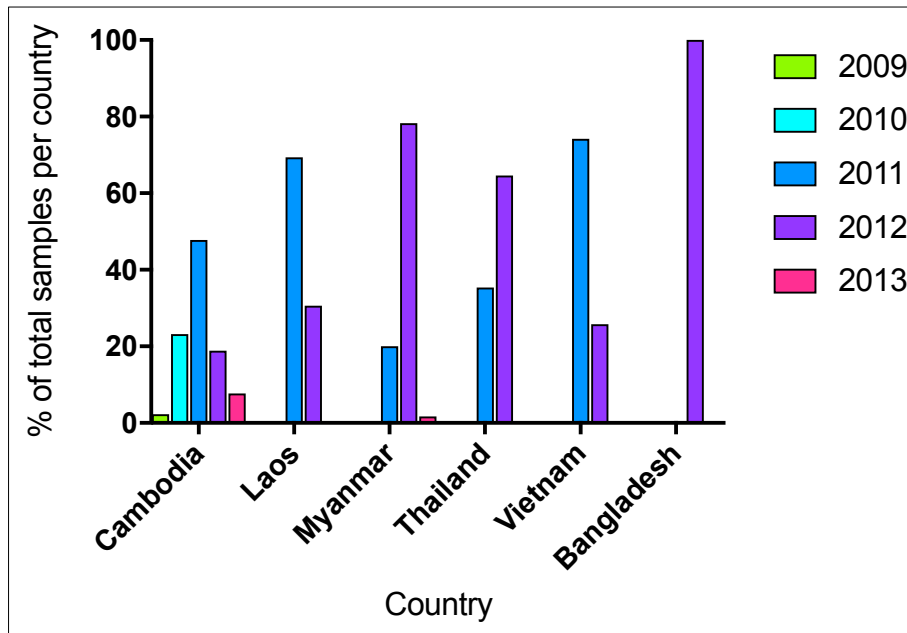

**Supplementary Figure 2 | Year of sampling of *P. falciparum* isolates of Asian origin, included in the *pfcr*t sequence analysis of the Pf3K release 3 genome data plus a more recent deposit of 87 genomes from Cambodia.** Most samples were collected in 2011–12, with additional samples from 2009–13 in Cambodia. The total number of genomes analyzed was 869. Sample numbers per country are listed in **Supplementary Table 1**.

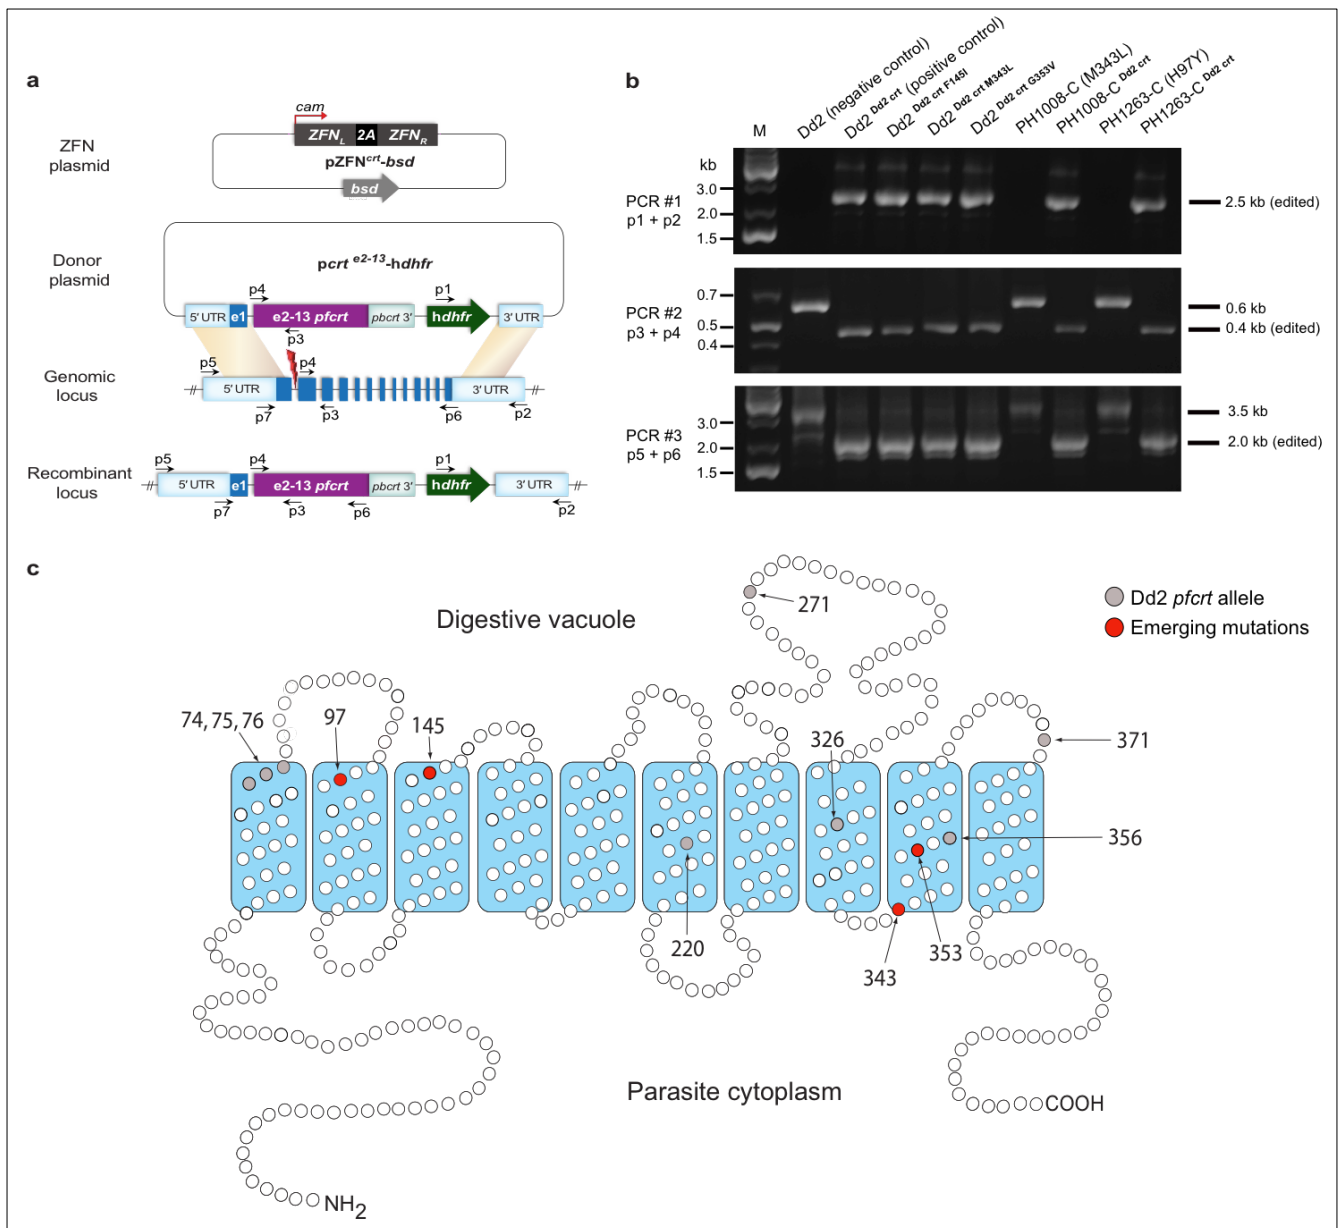

**Supplementary Figure 3 | Zinc-Finger Nuclease (ZFN)-mediated editing of the *pfcr1* gene.** (a) A two-plasmid transfection approach was used to edit the *pfcr1* gene with zinc-finger nucleases (ZFNs). (b) Three sets of PCRs were used to indicate gene editing, and the resulting modified locus was then verified by Sanger sequencing. (c) Schematic of the proposed PfCRT structure with ten transmembrane domains shows the relative locations of the mutations that make up the Dd2 *pfcr1* allele (gray) and the emerging Cambodian mutations that we showed by gene editing experiments are associated with PPQ resistance (red). Additional mutations detected in SE Asia, predominantly in Cambodia, are shown in **Supplementary Table 2**.

**Supplementary Table 1 | Frequency distribution of PfCRT haplotypes from the Pf3K dataset across Asia.**

| Isoform                    | # of variants | No. of isolate |        | Cambodia |       | Laos |       | Myanmar |       | Thailand |       | Vietnam |       | Bangladesh |       |
|----------------------------|---------------|----------------|--------|----------|-------|------|-------|---------|-------|----------|-------|---------|-------|------------|-------|
|                            |               | Total %        |        | %        | %     | %    | %     | %       | %     | %        | %     | %       |       |            |       |
| 3D7 (wild-type)            | 0             | 7              | 0.8%   | 6        | 1.2%  | -    | -     | -       | -     | -        | -     | 1       | 1.2%  | -          | -     |
| Dd2                        | 8             | 501            | 57.7%  | 265      | 52.1% | 12   | 17.6% | 51      | 98.1% | 122      | 96.1% | 39      | 48.1% | 12         | 37.5% |
| Dd2 + T93S (Novel)         | 9             | 3              | 0.3%   | 3        | 0.6%  | -    | -     | -       | -     | -        | -     | -       | -     | -          | -     |
| Dd2 + H97L (Novel)         | 9             | 9              | 1.0%   | 8        | 1.6%  | -    | -     | -       | -     | 1        | 0.8%  | -       | -     | -          | -     |
| <b>Dd2 + H97Y (Novel)</b>  | 9             | 19             | 2.2%   | 19       | 3.7%  | -    | -     | -       | -     | -        | -     | -       | -     | -          | -     |
| <b>Dd2 + F145I (Novel)</b> | 9             | 1              | 0.1%   | 1        | 0.2%  | -    | -     | -       | -     | -        | -     | -       | -     | -          | -     |
| Dd2 + L196P (Novel)        | 9             | 2              | 0.2%   | 0        | 0.0%  | -    | -     | -       | -     | 2        | 1.6%  | -       | -     | -          | -     |
| Dd2 + I218F (Novel)        | 9             | 11             | 1.3%   | 11       | 2.2%  | -    | -     | -       | -     | -        | -     | -       | -     | -          | -     |
| Dd2 + T256I (Novel)        | 9             | 4              | 0.5%   | 4        | 0.8%  | -    | -     | -       | -     | -        | -     | -       | -     | -          | -     |
| Dd2 + N295I (Novel)        | 9             | 1              | 0.1%   | 1        | 0.2%  | -    | -     | -       | -     | -        | -     | -       | -     | -          | -     |
| <b>Dd2 + M343L (Novel)</b> | 9             | 4              | 0.5%   | 4        | 0.8%  | -    | -     | -       | -     | -        | -     | -       | -     | -          | -     |
| <b>Dd2 + G353V (Novel)</b> | 9             | 9              | 1.0%   | 9        | 1.8%  | -    | -     | -       | -     | -        | -     | -       | -     | -          | -     |
| Dd2 + A366T (Novel)        | 9             | 3              | 0.3%   | 3        | 0.6%  | -    | -     | -       | -     | -        | -     | -       | -     | -          | -     |
| Dd2 + G367C (Novel)        | 9             | 2              | 0.2%   | 2        | 0.4%  | -    | -     | -       | -     | -        | -     | -       | -     | -          | -     |
| Dd2 + V370C (Novel)        | 9             | 1              | 0.1%   | 1        | 0.2%  | -    | -     | -       | -     | -        | -     | -       | -     | -          | -     |
| Dd2 - N75E (Novel)         | 7             | 5              | 0.6%   | 3        | 0.6%  | -    | -     | -       | -     | -        | -     | 2       | 2.5%  | -          | -     |
| Dd2 - A220S (Novel)        | 7             | 3              | 0.3%   | 3        | 0.6%  | -    | -     | -       | -     | -        | -     | -       | -     | -          | -     |
| Cam734                     | 9             | 123            | 14.2%  | 71       | 13.9% | 25   | 36.8% | -       | -     | -        | -     | 27      | 33.3% | -          | -     |
| GB4                        | 6             | 111            | 12.8%  | 75       | 14.7% | 28   | 41.2% | -       | -     | -        | -     | 8       | 9.9%  | -          | -     |
| GB4 + I194T (Novel)        | 7             | 11             | 1.3%   | 8        | 1.6%  | 3    | 4.4%  | -       | -     | -        | -     | -       | -     | -          | -     |
| GB4 - N75E (Novel)         | 5             | 4              | 0.5%   | 1        | 0.2%  | -    | -     | -       | -     | -        | -     | 3       | 3.7%  | -          | -     |
| GB4 - A220S (Novel)        | 5             | 2              | 0.2%   | 2        | 0.4%  | -    | -     | -       | -     | -        | -     | -       | -     | -          | -     |
| Cam783                     | 7             | 23             | 2.6%   | 2        | 0.4%  | -    | -     | -       | -     | -        | -     | 1       | 1.2%  | 20         | 62.5% |
| Cam738                     | 8             | 3              | 0.3%   | 3        | 0.6%  | -    | -     | -       | -     | -        | -     | -       | -     | -          | -     |
| Cam738 + N75E (Novel)      | 8             | 5              | 0.6%   | 4        | 0.8%  | -    | -     | -       | -     | 1        | 0.8%  | -       | -     | -          | -     |
| FCB                        | 7             | 2              | 0.2%   | 0        | 0.0%  | -    | -     | 1       | 1.9%  | 1        | 0.8%  | -       | -     | -          | -     |
| Total                      |               | 869            | 100.0% | 509      |       | 68   |       | 52      |       | 127      |       | 81      |       | 32         |       |
| Percentage of total        |               |                |        | 58.6%    |       | 7.8% |       | 6.0%    |       | 14.6%    |       | 9.3%    |       | 3.7%       |       |

Samples were collected from the Pf3K data version 3 (totaling 782 genomes that passed our analysis), supplemented with an additional 87 Cambodian genomes collected in 2012 and 2013 that were more recently deposited by the Pf3K consortium. This resulted in a total of 869 genomes, of which 509 were from Cambodia. A dash indicates that the allele was not observed in any genomes from that country.

Supplementary Table 2 | PfCRT haplotypes from the Pf3K dataset in Southeast Asia.

| Isoform                    | 74 | 75 | 76 | 93 | 97 | 144 | 145 | 148 | 194 | 196 | 218 | 220 | 224 | 228 | 256 | 271 | 295 | 321 | 326 | 333 | 343 | 353 | 356 | 366 | 367 | 370 | 371 |
|----------------------------|----|----|----|----|----|-----|-----|-----|-----|-----|-----|-----|-----|-----|-----|-----|-----|-----|-----|-----|-----|-----|-----|-----|-----|-----|-----|
| 3D7 (wild-type)            | M  | N  | K  | T  | H  | A   | F   | L   | I   | L   | I   | A   | V   | N   | T   | Q   | N   | L   | N   | T   | M   | G   | I   | A   | G   | V   | R   |
| Dd2                        | I  | E  | T  | T  | H  | A   | F   | L   | I   | L   | I   | S   | V   | N   | T   | E   | N   | L   | S   | T   | M   | G   | T   | A   | G   | V   | I   |
| Dd2 + T93S (Novel)         | I  | E  | T  | S  | H  | A   | F   | L   | I   | L   | I   | S   | V   | N   | T   | E   | N   | L   | S   | T   | M   | G   | T   | A   | G   | V   | I   |
| Dd2 + H97L (Novel)         | I  | E  | T  | T  | L  | A   | F   | L   | I   | L   | I   | S   | V   | N   | T   | E   | N   | L   | S   | T   | M   | G   | T   | A   | G   | V   | I   |
| <b>Dd2 + H97Y (Novel)</b>  | I  | E  | T  | T  | Y  | A   | F   | L   | I   | L   | I   | S   | V   | N   | T   | E   | N   | L   | S   | T   | M   | G   | T   | A   | G   | V   | I   |
| <b>Dd2 + F145I (Novel)</b> | I  | E  | T  | T  | H  | A   | I   | L   | I   | L   | I   | S   | V   | N   | T   | E   | N   | L   | S   | T   | M   | G   | T   | A   | G   | V   | I   |
| Dd2 + L196P (Novel)        | I  | E  | T  | T  | H  | A   | F   | L   | I   | P   | I   | S   | V   | N   | T   | E   | N   | L   | S   | T   | M   | G   | T   | A   | G   | V   | I   |
| Dd2 + I218F (Novel)        | I  | E  | T  | T  | H  | A   | F   | L   | I   | L   | F   | S   | V   | N   | T   | E   | N   | L   | S   | T   | M   | G   | T   | A   | G   | V   | I   |
| Dd2 + T256I (Novel)        | I  | E  | T  | T  | H  | A   | F   | L   | I   | L   | I   | S   | V   | N   | I   | E   | N   | L   | S   | T   | M   | G   | T   | A   | G   | V   | I   |
| Dd2 + N295I (Novel)        | I  | E  | T  | T  | H  | A   | F   | L   | I   | L   | I   | S   | V   | N   | T   | E   | I   | L   | S   | T   | M   | G   | T   | A   | G   | V   | I   |
| <b>Dd2 + M343L (Novel)</b> | I  | E  | T  | T  | H  | A   | F   | L   | I   | L   | I   | S   | V   | N   | T   | E   | N   | L   | S   | T   | L   | G   | T   | A   | G   | V   | I   |
| <b>Dd2 + G353V (Novel)</b> | I  | E  | T  | T  | H  | A   | F   | L   | I   | L   | I   | S   | V   | N   | T   | E   | N   | L   | S   | T   | M   | V   | T   | A   | G   | V   | I   |
| Dd2 + A366T (Novel)        | I  | E  | T  | T  | H  | A   | F   | L   | I   | L   | I   | S   | V   | N   | T   | E   | N   | L   | S   | T   | M   | G   | T   | T   | G   | V   | I   |
| Dd2 + G367C (Novel)        | I  | E  | T  | T  | H  | A   | F   | L   | I   | L   | I   | S   | V   | N   | T   | E   | N   | L   | S   | T   | M   | G   | T   | A   | C   | V   | I   |
| Dd2 + V370C (Novel)        | I  | E  | T  | T  | H  | A   | F   | L   | I   | L   | I   | S   | V   | N   | T   | E   | N   | L   | S   | T   | M   | G   | T   | A   | G   | C   | I   |
| Dd2 - N75E (Novel)         | I  | N  | T  | T  | H  | A   | F   | L   | I   | L   | I   | S   | V   | N   | T   | E   | N   | L   | S   | T   | M   | G   | T   | A   | G   | V   | I   |
| Dd2 - A220S (Novel)        | I  | E  | T  | T  | H  | A   | F   | L   | I   | L   | I   | A   | V   | N   | T   | E   | N   | L   | S   | T   | M   | G   | T   | A   | G   | V   | I   |
| Cam734                     | I  | D  | T  | T  | H  | F   | F   | I   | T   | L   | I   | S   | V   | N   | T   | E   | N   | L   | N   | S   | M   | G   | I   | A   | G   | V   | R   |
| GB4                        | I  | E  | T  | T  | H  | A   | F   | L   | I   | L   | I   | S   | V   | N   | T   | E   | N   | L   | N   | T   | M   | G   | I   | A   | G   | V   | I   |
| GB4 + I194T (Novel)        | I  | E  | T  | T  | H  | A   | F   | L   | T   | L   | I   | S   | V   | N   | T   | E   | N   | L   | N   | T   | M   | G   | I   | A   | G   | V   | I   |
| GB4 - N75E (Novel)         | I  | N  | T  | T  | H  | A   | F   | L   | I   | L   | I   | S   | V   | N   | T   | E   | N   | L   | N   | T   | M   | G   | I   | A   | G   | V   | I   |
| GB4 - A220S (Novel)        | I  | E  | T  | T  | H  | A   | F   | L   | I   | L   | I   | A   | V   | N   | T   | E   | N   | L   | N   | T   | M   | G   | I   | A   | G   | V   | I   |
| Cam783                     | I  | E  | T  | T  | H  | A   | F   | L   | I   | L   | I   | S   | V   | N   | T   | E   | N   | L   | N   | T   | M   | G   | T   | A   | G   | V   | I   |
| Cam738                     | I  | D  | T  | T  | H  | A   | F   | I   | T   | L   | I   | S   | V   | N   | T   | E   | N   | L   | N   | S   | M   | G   | I   | A   | G   | V   | R   |
| Cam738 + N75E (Novel)      | I  | E  | T  | T  | H  | A   | F   | I   | T   | L   | I   | S   | V   | N   | T   | E   | N   | L   | N   | S   | M   | G   | I   | A   | G   | V   | R   |
| FCB                        | I  | E  | T  | T  | H  | A   | F   | L   | I   | L   | I   | S   | V   | N   | T   | E   | N   | L   | S   | T   | M   | G   | I   | A   | G   | V   | I   |

Differences from the 3D7 wild-type *pfcr*t allele are highlighted in light grey for Dd2 mutations and dark grey for other mutations.

**Supplementary Table 3 | Western Cambodian PfCRT haplotypes over time and K13 status.**

| Isoform                    | 2010 |    | 2011 |     | 2012 |     | 2013 |    | 2016 |      | K13 Haplotypes by Percentage |       |       |       |      |   |
|----------------------------|------|----|------|-----|------|-----|------|----|------|------|------------------------------|-------|-------|-------|------|---|
|                            | #    | %  | #    | %   | #    | %   | #    | %  | #    | %    | Y493H                        | R539T | I543T | C580Y | WT   |   |
| 3D7 (wild-type)            | -    | -  | -    | -   | -    | -   | -    | -  | -    | -    | -                            | -     | -     | -     | -    | - |
| Dd2                        | 6    | 75 | 25   | 89  | 14   | 58  | 8    | 67 | 1    | 4.8  | 3.7%                         | 22.2% | 1.9%  | 63%   | 9.3% |   |
| Dd2 + T93S (Novel)         | -    | -  | -    | -   | -    | -   | -    | -  | 2    | 9.5  | -                            | -     | -     | 100%  | -    |   |
| Dd2 + H97L (Novel)         | -    | -  | -    | -   | 2    | 8.3 | -    | -  | -    | -    | -                            | -     | -     | 100%  | -    |   |
| <b>Dd2 + H97Y (Novel)</b>  | -    | -  | 1    | 3.6 | -    | -   | -    | -  | 3    | 14   | -                            | -     | -     | 100%  | -    |   |
| <b>Dd2 + F145I (Novel)</b> | -    | -  | -    | -   | -    | -   | -    | -  | 1    | 4.8  | -                            | -     | -     | 100%  | -    |   |
| Dd2 + I218F (Novel)        | -    | -  | -    | -   | -    | -   | -    | -  | 2    | 9.5  | -                            | -     | -     | 100%  | -    |   |
| <b>Dd2 + M343L (Novel)</b> | -    | -  | -    | -   | 5    | 21  | 4    | 33 | -    | -    | -                            | -     | -     | 100%  | -    |   |
| <b>Dd2 + G353V (Novel)</b> | -    | -  | -    | -   | 2    | 8.3 | -    | -  | 12   | 57.1 | -                            | -     | -     | 100%  | -    |   |
| GB4                        | 1    | 13 | 2    | 7.1 | 1    | 4.2 | -    | -  | -    | -    | -                            | -     | -     | -     | 100% |   |
| Cam783                     | 1    | 13 | -    | -   | -    | -   | -    | -  | -    | -    | -                            | -     | -     | -     | 100% |   |
| Total                      | 8    |    | 28   |     | 24   |     | 12   |    | 21   |      | 2                            | 12    | 1     | 68    | 10   |   |

Data were generated from complete genome sequences of 93 Cambodian isolates collected by researchers at the Pasteur Institute in Cambodia from Pailin, Kampong Speu, Kampong Som, Kampong Thom, Oddar Meanchey, Battambang, Pursat and Sieam Reap in the western half of Cambodia. 19 of the samples from 2016 were from Pursat, and all harbored novel PfCRT mutations.

**Supplementary Table 4 | PSA<sub>0-3h</sub> results.**

| Parasite line                | % Survival  | N | Notation | <i>p</i> value     |
|------------------------------|-------------|---|----------|--------------------|
| 3D7                          | 0.3 ± 0.2   | 4 | n.s.     | >0.99              |
| GC03                         | 0.4 ± 0.2   | 4 | n.s.     | >0.99              |
| Dd2                          | 0.3 ± 0.2   | 4 | n.s.     | >0.99              |
| Dd2 <sup>Dd2 crt</sup>       | 0.3 ± 0.3   | 4 | N.A.     | N.A.               |
| Dd2 <sup>Dd2 crt F145I</sup> | 23.4 ± 2.1  | 6 | **       | 0.010 <sup>a</sup> |
| Dd2 <sup>Dd2 crt M343L</sup> | 12.4 ± 2.1  | 6 | **       | 0.010 <sup>a</sup> |
| Dd2 <sup>Dd2 crt G353V</sup> | 16.7 ± 4.7  | 5 | *        | 0.016 <sup>a</sup> |
| PH1008-C (M343L)             | 14.4 ± 1.5  | 6 | N.A.     | N.A.               |
| PH1008-C <sup>Dd2 crt</sup>  | 0.1 ± 0.1   | 4 | **       | 0.010 <sup>b</sup> |
| PH1263-C (H97Y)              | 14.5 ± 4.3  | 4 | N.A.     | N.A.               |
| PH1263-C <sup>Dd2 crt</sup>  | 0.03 ± 0.02 | 4 | **       | 0.010 <sup>c</sup> |

PSA<sub>0-3h</sub>, piperaquine survival assays beginning with 0-3h post-invasion rings. Percent survival rates were calculated as means ± SEM from multiple independent experiments (N) performed in duplicate. <sup>a</sup>Statistical comparisons were made against the Dd2<sup>Dd2 crt</sup> clone. <sup>b</sup>Comparisons were against PH1008-C. <sup>c</sup>Comparisons were against PH1263-C. Statistics employed Mann-Whitney *U* tests. n.s., not significant. N.A., not applicable. 1 to 3 assays were also performed with 0.8 μM VP, which showed no change or net reduction in survival in either sensitive or resistant parasites.

**Supplementary Table 5 | Piperaquine IC<sub>50</sub> and IC<sub>90</sub> values and associated statistics.**

| Parasite line                | Mean ± SEM                |   | Statistical outputs |                     |
|------------------------------|---------------------------|---|---------------------|---------------------|
|                              | PPQ IC <sub>50</sub> (nM) | N | Notation            | <i>p</i> value      |
| 3D7                          | 13.7 ± 1.1                | 9 | ***                 | 0.0002 <sup>a</sup> |
| GC03                         | 15.3 ± 2.2                | 5 | *                   | 0.012 <sup>a</sup>  |
| Dd2                          | 22.4 ± 2.1                | 8 | n.s.                | 0.37 <sup>a</sup>   |
| Dd2 <sup>Dd2 crt</sup>       | 27.6 ± 3.1                | 9 | N.A.                | N.A.                |
| Dd2 <sup>Dd2 crt F145I</sup> | 65.3 ± 3.1                | 4 | **                  | 0.003 <sup>a</sup>  |
| Dd2 <sup>Dd2 crt M343L</sup> | 37.6 ± 4.8                | 6 | n.s.                | 0.11 <sup>a</sup>   |
| Dd2 <sup>Dd2 crt G353V</sup> | 31.8 ± 7.4                | 5 | n.s.                | 0.70 <sup>a</sup>   |
| PH1008-C                     | 39.6 ± 18.5               | 4 | N.A.                | N.A.                |
| PH1008-C <sup>Dd2 crt</sup>  | 21.3 ± 3.0                | 5 | n.s.                | 1.00 <sup>b</sup>   |
| PH1263-C                     | 81.2 ± 26.0               | 4 | N.A.                | N.A.                |
| PH1263-C <sup>Dd2 crt</sup>  | 18.0 ± 3.0                | 4 | *                   | 0.029 <sup>c</sup>  |

<sup>a</sup>Statistical comparisons were made against the Dd2<sup>Dd2 crt</sup> clone.

<sup>b</sup>Comparisons were against PH1008-C. <sup>c</sup>Comparisons were against PH1263-C. N, number of independent repeats (assays conducted with technical duplicates). Statistics employed Mann-Whitney *U* tests. PPQ, piperaquine. n.s., not significant. N.A., not applicable.

| Parasite line                | Mean ± SEM                |   | Statistical outputs |                      |
|------------------------------|---------------------------|---|---------------------|----------------------|
|                              | PPQ IC <sub>90</sub> (nM) | N | Notation            | <i>p</i> value       |
| 3D7                          | 21.9 ± 2.2                | 9 | ****                | <0.0001 <sup>a</sup> |
| GC03                         | 25.8 ± 2.9                | 5 | *                   | 0.012 <sup>a</sup>   |
| Dd2                          | 45.5 ± 5.1                | 8 | n.s.                | 0.48 <sup>a</sup>    |
| Dd2 <sup>Dd2 crt</sup>       | 50.2 ± 4.2                | 9 | N.A.                | N.A.                 |
| Dd2 <sup>Dd2 crt F145I</sup> | 5769 ± 666                | 4 | **                  | 0.003 <sup>a</sup>   |
| Dd2 <sup>Dd2 crt M343L</sup> | 93.1 ± 9.7                | 6 | ***                 | 0.0004 <sup>a</sup>  |
| Dd2 <sup>Dd2 crt G353V</sup> | 3741 ± 1981               | 4 | **                  | 0.003 <sup>a</sup>   |
| PH1008-C                     | > 50 μM                   | 4 | N.A.                | N.A.                 |
| PH1008-C <sup>Dd2 crt</sup>  | 42.4 ± 6.2                | 5 | ****                | <0.0001 <sup>b</sup> |
| PH1263-C                     | 250.8 ± 95.4              | 4 | N.A.                | N.A.                 |
| PH1263-C <sup>Dd2 crt</sup>  | 27.8 ± 3.0                | 4 | *                   | 0.029 <sup>c</sup>   |

Please refer to footnotes in upper table.



**Supplementary Table 6 | [<sup>3</sup>H]-Piperaquine cellular accumulation ratios.**

| Parasite line                | Mean ± SEM |   | Statistical outputs |                      |
|------------------------------|------------|---|---------------------|----------------------|
|                              | CAR        | N | Notation            | <i>p</i> value       |
| 3D7                          | 6323 ± 352 | 7 | ****                | <0.0001 <sup>a</sup> |
| GC03                         | 4933 ± 229 | 4 | ***                 | 0.0005 <sup>a</sup>  |
| Dd2                          | 2835 ± 244 | 6 | n.s.                | 0.73                 |
| Dd2 <sup>Dd2 crt</sup>       | 3002 ± 275 | 7 | N.A.                | N.A.                 |
| Dd2 <sup>Dd2 crt F145I</sup> | 2878 ± 327 | 3 | n.s.                | 0.72 <sup>a</sup>    |
| Dd2 <sup>Dd2 crt M343L</sup> | 2514 ± 231 | 6 | n.s.                | 0.43 <sup>a</sup>    |
| Dd2 <sup>Dd2 crt G353V</sup> | 2642 ± 402 | 3 | n.s.                | 0.21 <sup>a</sup>    |
| PH1008-C                     | 1889 ± 163 | 4 | N.A.                | N.A.                 |
| PH1008-C <sup>Dd2 crt</sup>  | 3358 ± 121 | 4 | ***                 | 0.0003 <sup>b</sup>  |
| PH1263-C                     | 1690 ± 185 | 3 | N.A.                | N.A.                 |
| PH1263-C <sup>Dd2 crt</sup>  | 3029 ± 139 | 4 | ***                 | 0.0007 <sup>c</sup>  |

<sup>a</sup>Statistical comparisons were made against the Dd2<sup>Dd2 crt</sup> clone.

<sup>b</sup>Comparisons were against PH1008-C. <sup>c</sup>Comparisons were against PH1263-C. N, number of independent repeats (assays conducted with technical duplicates). Statistics employed Mann-Whitney *U* tests. CAR, cellular accumulation ratio. PPQ, piperazine. n.s., not significant. N.A., not applicable.

**Supplementary Table 7 | Chloroquine and monodesethyl-chloroquine IC<sub>50</sub> values and associated statistics.**

| Parasite line                | Mean ± SEM               |    | Statistical outputs |                      |
|------------------------------|--------------------------|----|---------------------|----------------------|
|                              | CQ IC <sub>50</sub> (nM) | N  | Notation            | p value              |
| 3D7                          | 9.0 ± 0.8                | 8  | ****                | <0.0001 <sup>a</sup> |
| GC03                         | 9.6 ± 2.1                | 5  | ***                 | 0.005 <sup>a</sup>   |
| Dd2                          | 156.5 ± 9.3              | 10 | *                   | 0.02 <sup>a</sup>    |
| Dd2 <sup>Dd2 crt</sup>       | 129.5 ± 9.0              | 11 | N.A.                | N.A.                 |
| Dd2 <sup>Dd2 crt F145I</sup> | 19.3 ± 1.3               | 6  | ***                 | 0.0002 <sup>a</sup>  |
| Dd2 <sup>Dd2 crt M343L</sup> | 41.8 ± 1.9               | 5  | ***                 | 0.0005 <sup>a</sup>  |
| Dd2 <sup>Dd2 crt G353V</sup> | 54.6 ± 4.9               | 4  | **                  | 0.002 <sup>a</sup>   |
| PH1008-C                     | 160.5 ± 8.0              | 10 | N.A.                | N.A.                 |
| PH1008-C <sup>Dd2 crt</sup>  | 112.7 ± 15.8             | 10 | *                   | 0.043 <sup>b</sup>   |
| PH1263-C                     | 258.2 ± 38.9             | 6  | N.A.                | N.A.                 |
| PH1263-C <sup>Dd2 crt</sup>  | 170.4 ± 25.5             | 6  | n.s.                | 0.065 <sup>c</sup>   |

<sup>a</sup>Statistical comparisons were made against the Dd2<sup>Dd2 crt</sup> clone. <sup>b</sup>Comparisons were against PH1008-C. <sup>c</sup>Comparisons were against PH1263-C. N, number of independent repeats (assays conducted with technical duplicates). Statistics employed Mann-Whitney *U* tests. CQ, chloroquine. n.s., not significant. N.A., not applicable.

| Parasite line                | Mean ± SEM                  |    | Statistical outputs |                      |
|------------------------------|-----------------------------|----|---------------------|----------------------|
|                              | md-CQ IC <sub>50</sub> (nM) | N  | Notation            | p value              |
| 3D7                          | 33.1 ± 5.7                  | 10 | ****                | <0.0001 <sup>a</sup> |
| GC03                         | 52.8 ± 9.5                  | 6  | ****                | <0.0001 <sup>a</sup> |
| Dd2                          | 1663 ± 141                  | 10 | n.s.                | 0.98 <sup>a</sup>    |
| Dd2 <sup>Dd2 crt</sup>       | 1641 ± 108                  | 15 | N.A.                | N.A.                 |
| Dd2 <sup>Dd2 crt F145I</sup> | 191 ± 21.3                  | 4  | ***                 | 0.0005 <sup>a</sup>  |
| Dd2 <sup>Dd2 crt M343L</sup> | 457 ± 25.5                  | 6  | ****                | <0.0001 <sup>a</sup> |
| Dd2 <sup>Dd2 crt G353V</sup> | 475 ± 57.7                  | 6  | ****                | <0.0001 <sup>a</sup> |
| PH1008-C                     | 1418 ± 259                  | 4  | N.A.                | N.A.                 |
| PH1008-C <sup>Dd2 crt</sup>  | 1527 ± 270                  | 5  | n.s.                | 0.90 <sup>b</sup>    |
| PH1263-C                     | 3313 ± 435                  | 4  | N.A.                | N.A.                 |
| PH1263-C <sup>Dd2 crt</sup>  | 1345 ± 229                  | 5  | *                   | 0.016 <sup>c</sup>   |

Please refer to footnotes in upper table. md-CQ, monodesethyl-chloroquine.

**Supplementary Table 8 | Monodesethyl-amodiaquine and quinine IC<sub>50</sub> values and associated statistics.**

| Parasite line                | Mean ± SEM                   |    | Statistical outputs |                      |
|------------------------------|------------------------------|----|---------------------|----------------------|
|                              | md-ADQ IC <sub>50</sub> (nM) | N  | Notation            | p value              |
| 3D7                          | 15.9 ± 1.9                   | 10 | ****                | <0.0001 <sup>a</sup> |
| GC03                         | 14 ± 1.2                     | 6  | ****                | <0.0001 <sup>a</sup> |
| Dd2                          | 45.6 ± 3.8                   | 11 | n.s.                | 0.12 <sup>a</sup>    |
| Dd2 <sup>Dd2 crt</sup>       | 40.6 ± 2.4                   | 15 | N.A.                | N.A.                 |
| Dd2 <sup>Dd2 crt F145I</sup> | 16.8 ± 1.5                   | 5  | ***                 | 0.0001 <sup>a</sup>  |
| Dd2 <sup>Dd2 crt M343L</sup> | 30.1 ± 2.1                   | 6  | *                   | 0.014 <sup>a</sup>   |
| Dd2 <sup>Dd2 crt G353V</sup> | 23.0 ± 1.3                   | 6  | ****                | <0.0001 <sup>a</sup> |
| PH1008-C                     | 33.9 ± 3.5                   | 6  | N.A.                | N.A.                 |
| PH1008-C <sup>Dd2 crt</sup>  | 42.7 ± 5.0                   | 6  | n.s.                | 0.31 <sup>b</sup>    |
| PH1263-C                     | 63.9 ± 5.1                   | 5  | N.A.                | N.A.                 |
| PH1263-C <sup>Dd2 crt</sup>  | 41.0 ± 2.9                   | 6  | **                  | 0.009 <sup>c</sup>   |

<sup>a</sup>Statistical comparisons were made against the Dd2<sup>Dd2 crt</sup> clone.

<sup>b</sup>Comparisons were against PH1008-C. <sup>c</sup>Comparisons were against PH1263-C. N, number of independent repeats (assays conducted with technical duplicates). Statistics employed Mann-Whitney tests. md-ADQ, monodesethyl-amodiaquine. n.s., not significant. N.A., not applicable.

| Parasite line                | Mean ± SEM               |    | Statistical outputs |                      |
|------------------------------|--------------------------|----|---------------------|----------------------|
|                              | QN IC <sub>50</sub> (nM) | N  | Notation            | p value              |
| 3D7                          | 26.1 ± 2.2               | 14 | ****                | <0.0001 <sup>a</sup> |
| GC03                         | 72.7 ± 12.7              | 7  | ***                 | 0.0002 <sup>a</sup>  |
| Dd2                          | 163.2 ± 22.9             | 14 | n.s.                | 0.59 <sup>a</sup>    |
| Dd2 <sup>Dd2 crt</sup>       | 174.2 ± 13.9             | 15 | N.A.                | N.A.                 |
| Dd2 <sup>Dd2 crt F145I</sup> | 57.4 ± 8.4               | 5  | ***                 | 0.0001 <sup>a</sup>  |
| Dd2 <sup>Dd2 crt M343L</sup> | 93.9 ± 9.6               | 9  | ***                 | 0.001 <sup>a</sup>   |
| Dd2 <sup>Dd2 crt G353V</sup> | 77.6 ± 15.1              | 6  | **                  | 0.002 <sup>a</sup>   |
| PH1008-C                     | 61.8 ± 15.7              | 5  | N.A.                | N.A.                 |
| PH1008-C <sup>Dd2 crt</sup>  | 145.6 ± 28.1             | 6  | *                   | 0.035 <sup>b</sup>   |
| PH1263-C                     | 44.2 ± 7.6               | 6  | N.A.                | N.A.                 |
| PH1263-C <sup>Dd2 crt</sup>  | 142.1 ± 22.5             | 6  | **                  | 0.002 <sup>c</sup>   |

Please refer to footnotes in upper table. QN, quinine.

**Supplementary Table 9 | Mefloquine and lumefantrine IC<sub>50</sub> values and associated statistics.**

| Parasite line                | Mean ± SEM                |    | Statistical outputs |                    |
|------------------------------|---------------------------|----|---------------------|--------------------|
|                              | MFQ IC <sub>50</sub> (nM) | N  | Notation            | <i>p</i> value     |
| 3D7                          | 9.7 ± 1.3                 | 15 | n.s.                | 0.43 <sup>a</sup>  |
| GC03                         | 9.2 ± 1.0                 | 8  | n.s.                | 0.42 <sup>a</sup>  |
| Dd2                          | 12.9 ± 1.3                | 12 | n.s.                | 0.20 <sup>a</sup>  |
| Dd2 <sup>Dd2 crt</sup>       | 10.1 ± 0.5                | 15 | N.A.                | N.A.               |
| Dd2 <sup>Dd2 crt F145I</sup> | 7.4 ± 1.4                 | 6  | n.s.                | 0.20 <sup>a</sup>  |
| Dd2 <sup>Dd2 crt M343L</sup> | 7.3 ± 0.4                 | 6  | **                  | 0.002 <sup>a</sup> |
| Dd2 <sup>Dd2 crt G353V</sup> | 8.9 ± 0.5                 | 6  | n.s.                | 0.21 <sup>a</sup>  |
| PH1008-C                     | 8.6 ± 1.4                 | 5  | N.A.                | N.A.               |
| PH1008-C <sup>Dd2 crt</sup>  | 13.9 ± 1.9                | 6  | n.s.                | 0.13 <sup>b</sup>  |
| PH1263-C                     | 3.5 ± 1                   | 6  | N.A.                | N.A.               |
| PH1263-C <sup>Dd2 crt</sup>  | 12.5 ± 2.1                | 6  | **                  | 0.004 <sup>c</sup> |

<sup>a</sup>Statistical comparisons were made against the Dd2<sup>Dd2 crt</sup> clone.

<sup>b</sup>Comparisons were against PH1008-C. <sup>c</sup>Comparisons were against PH1263-C. N, number of independent repeats (assays conducted with technical duplicates). Statistics employed Mann-Whitney *U* tests. MFQ, mefloquine. n.s., not significant. N.A., not applicable.

| Parasite line                | Mean ± SEM                |   | Statistical outputs |                    |
|------------------------------|---------------------------|---|---------------------|--------------------|
|                              | LMF IC <sub>50</sub> (nM) | N | Notation            | <i>p</i> value     |
| 3D7                          | 2.9 ± 0.6                 | 9 | n.s.                | 0.21 <sup>a</sup>  |
| GC03                         | 3.9 ± 0.5                 | 4 | *                   | 0.011 <sup>a</sup> |
| Dd2                          | 1.9 ± 0.3                 | 8 | n.s.                | 0.91 <sup>a</sup>  |
| Dd2 <sup>Dd2 crt</sup>       | 1.8 ± 0.3                 | 9 | N.A.                | N.A.               |
| Dd2 <sup>Dd2 crt F145I</sup> | 1.6 ± 0.1                 | 5 | n.s.                | 1.00 <sup>a</sup>  |
| Dd2 <sup>Dd2 crt M343L</sup> | 3.7 ± 0.2                 | 4 | *                   | 0.011 <sup>a</sup> |
| Dd2 <sup>Dd2 crt G353V</sup> | 1.3 ± 0.2                 | 7 | n.s.                | 0.36 <sup>a</sup>  |
| PH1008-C                     | 1.2 ± 0.2                 | 4 | N.A.                | N.A.               |
| PH1008-C <sup>Dd2 crt</sup>  | 4.4 ± 1.2                 | 5 | *                   | 0.016 <sup>b</sup> |
| PH1263-C                     | 3.6 ± 0.7                 | 4 | N.A.                | N.A.               |
| PH1263-C <sup>Dd2 crt</sup>  | 8.0 ± 0.5                 | 4 | *                   | 0.029 <sup>c</sup> |

Please refer to footnotes in upper table. LMF, lumefantrine.

**Supplementary Table 10 | Dihydroartemisinin IC<sub>50</sub> values and associated statistics.**

| Parasite line                | Mean ± SEM                |    | Statistical outputs |                     |
|------------------------------|---------------------------|----|---------------------|---------------------|
|                              | DHA IC <sub>50</sub> (nM) | N  | Notation            | <i>p</i> value      |
| 3D7                          | 0.8 ± 0.1                 | 11 | **                  | 0.004 <sup>a</sup>  |
| GC03                         | 0.5 ± 0.2                 | 5  | **                  | 0.007 <sup>a</sup>  |
| Dd2                          | 1.0 ± 0.1                 | 10 | n.s.                | 0.25 <sup>a</sup>   |
| Dd2 <sup>Dd2 crt</sup>       | 1.2 ± 0.1                 | 9  | N.A.                | N.A.                |
| Dd2 <sup>Dd2 crt F145I</sup> | 0.7 ± 0.1                 | 6  | ***                 | 0.0008 <sup>a</sup> |
| Dd2 <sup>Dd2 crt M343L</sup> | 0.6 ± 0.1                 | 5  | ***                 | 0.001 <sup>a</sup>  |
| Dd2 <sup>Dd2 crt G353V</sup> | 1.3 ± 0.3                 | 4  | n.s.                | 1.00 <sup>a</sup>   |
| PH1008-C                     | 1.5 ± 0.2                 | 4  | N.A.                | N.A.                |
| PH1008-C <sup>Dd2 crt</sup>  | 0.6 ± 0.1                 | 4  | *                   | 0.029 <sup>b</sup>  |
| PH1263-C                     | 2.4 ± 0.1                 | 4  | N.A.                | N.A.                |
| PH1263-C <sup>Dd2 crt</sup>  | 1.9 ± 0.3                 | 4  | n.s.                | 0.29 <sup>c</sup>   |

<sup>a</sup>Statistical comparisons were made against the Dd2<sup>Dd2 crt</sup> clone. <sup>b</sup>Comparisons were against PH1008-C. <sup>c</sup>Comparisons were against PH1263-C. N, number of independent repeats (assays conducted with technical duplicates). Statistics employed Mann-Whitney *U* tests. DHA, dihydroartemisinin. n.s., not significant. N.A., not applicable.

**Supplementary Table 11 | Verapamil reversibility of chloroquine and piperazine IC<sub>50</sub> values.**

| Parasite line                | CQ reversibility | N | Statistics compared to 3D7 |         | Statistics compared to parent |                    | % VP inhibition <sup>d</sup> |
|------------------------------|------------------|---|----------------------------|---------|-------------------------------|--------------------|------------------------------|
|                              |                  |   | Notation                   | p value | Notation                      | p value            |                              |
| 3D7                          | 0.5% ± 0.5%      | 4 | N.A.                       | --      | N.A.                          | --                 | 8.9% ± 3.2%                  |
| GC03                         | 0.5% ± 0.5%      | 4 | n.s.                       | >0.99   | N.A.                          | --                 | 6.6% ± 3.5%                  |
| Dd2                          | 71.8% ± 3.0%     | 4 | *                          | 0.029   | n.s.                          | 0.71 <sup>a</sup>  | 7.8% ± 4.9%                  |
| Dd2 <sup>Dd2 crt</sup>       | 72.8% ± 1.3%     | 4 | *                          | 0.029   | N.A.                          | --                 | 8.7% ± 1.4%                  |
| Dd2 <sup>Dd2 crt F145I</sup> | 25.8% ± 10.8%    | 6 | n.s.                       | 0.11    | **                            | 0.010 <sup>a</sup> | 45.2% ± 5.6%                 |
| Dd2 <sup>Dd2 crt M343L</sup> | 43.3% ± 10.9%    | 4 | *                          | 0.029   | *                             | 0.029 <sup>a</sup> | 33.7% ± 10.4%                |
| Dd2 <sup>Dd2 crt G353V</sup> | 53.3% ± 3.4%     | 6 | *                          | 0.029   | **                            | 0.010 <sup>a</sup> | 35.5% ± 7.6%                 |
| PH1008-C                     | 62.8% ± 1.7%     | 4 | *                          | 0.029   | N.A.                          | --                 | 18.0% ± 4.1%                 |
| PH1008-C <sup>Dd2 crt</sup>  | 65.3% ± 1.4%     | 4 | *                          | 0.029   | n.s.                          | 0.63 <sup>b</sup>  | 13.2% ± 4.4%                 |
| PH1263-C                     | 59.8% ± 4.5%     | 6 | **                         | 0.010   | N.A.                          | --                 | 22.4% ± 3.4%                 |
| PH1263-C <sup>Dd2 crt</sup>  | 63.8% ± 2.6%     | 4 | *                          | 0.029   | n.s.                          | 0.35 <sup>c</sup>  | 14.2% ± 1.7%                 |

Reversibility is defined as the percent reduction in mean IC<sub>50</sub> for CQ in the presence of 0.8 μM VP compared to the mean IC<sub>50</sub> for CQ alone. The calculation is defined as ((mean IC<sub>50</sub> CQ alone - mean IC<sub>50</sub> CQ + VP) / mean IC<sub>50</sub> CQ alone), expressed as a percentage. <sup>a</sup>Statistical comparisons were made against the Dd2<sup>Dd2 crt</sup> clone.

<sup>b</sup>Comparisons were against PH1008-C. <sup>c</sup>Comparisons were against PH1263-C. <sup>d</sup>%VP inhibition measures the percent inhibition of parasite growth in the presence of 0.8 μM VP compared to no-drug controls (no CQ). N, number of independent repeats (assays conducted with technical duplicates). Statistics employed Mann-Whitney *U* tests. n.s., not significant. N.A., not applicable.

| Parasite line                | PPQ reversibility | N | Statistics compared to 3D7 |         | Statistics compared to parent |                    |
|------------------------------|-------------------|---|----------------------------|---------|-------------------------------|--------------------|
|                              |                   |   | Notation                   | p value | Notation                      | p value            |
| 3D7                          | 7.8% ± 4.5%       | 4 | N.A.                       | --      | N.A.                          | --                 |
| GC03                         | 17.0% ± 5.7%      | 4 | ns                         | 0.49    | N.A.                          | --                 |
| Dd2                          | 2.0% ± 4.5%       | 4 | ns                         | 0.49    | ns                            | 0.89 <sup>a</sup>  |
| Dd2 <sup>Dd2 crt</sup>       | 5.0% ± 9.2%       | 4 | ns                         | 0.94    | N.A.                          | --                 |
| Dd2 <sup>Dd2 crt F145I</sup> | 16.6% ± 17.4%     | 5 | ns                         | 0.73    | ns                            | 0.56 <sup>a</sup>  |
| Dd2 <sup>Dd2 crt M343L</sup> | 32.5% ± 5.0%      | 4 | *                          | 0.029   | ns                            | 0.057 <sup>a</sup> |
| Dd2 <sup>Dd2 crt G353V</sup> | 43.4% ± 15.2%     | 3 | ns                         | 0.11    | ns                            | 0.23 <sup>a</sup>  |
| PH1008-C                     | N.D.              | 3 | N.A.                       | --      | N.A.                          | --                 |
| PH1008-C <sup>Dd2 crt</sup>  | 7.0% ± 8.0%       | 4 | ns                         | 0.97    | N.A.                          | --                 |
| PH1263-C                     | N.D.              | 4 | N.A.                       | --      | N.A.                          | --                 |
| PH1263-C <sup>Dd2 crt</sup>  | 0.0% ± 6.2%       | 4 | ns                         | 0.49    | N.A.                          | --                 |

Please refer to footnotes in upper table. N.D., not determined (the flat dose-response curves around the IC<sub>50</sub> region precluded precise calculations of VP reversibility).

**Supplementary Table 12 | Raw fitness data from co-culture experiments.**

| Day | GC03  |       |       |       |       |       | Dd2   |       |       |       |       |       |
|-----|-------|-------|-------|-------|-------|-------|-------|-------|-------|-------|-------|-------|
| 0   | 48.05 | 42.35 | 49.37 | 50.28 | 52.87 | 47.59 | 40.91 | 37.84 | 44.55 | 44.23 | 47.34 | 46.39 |
| 2   | 50    | 49.46 | 48.39 | 67.95 | 64.95 | 64.66 | 43.62 | 42.94 | 43.9  | 51.81 | 58.92 | 50.4  |
| 5   | 80.43 | 81.64 | 80.67 | 53.1  | 48.35 | 50.16 | 61.06 | 59.29 | 60.96 | 45.45 | 43.61 | 39.15 |
| 7   | 77.64 | 75.39 | 74.31 | 39.82 | 35.8  | 39.63 | 35.53 | 36.47 | 38.69 | 27.78 | 27.6  | 28.13 |
| 9   | 60.8  | 58.89 | 61.22 | 32.74 | 35    | 30.86 | 17.99 | 17.84 | 19.63 | 14.51 | 17.78 | 14.29 |
| 12  | 44.23 | 46.65 | 45.88 | 33.01 | 30.17 | 31.33 | 16.22 | 14.46 | 14.44 | 13    | 11.01 | 10.44 |
| 14  | 47.34 | 45.7  | 48.72 | 31.93 | 29.81 | 28.66 | 10.03 | 9.61  | 6.98  | 10.68 | 9.41  | 9.21  |
| 16  | 47.84 | 51.06 | 54.59 | 16.73 | 21.79 | 16.69 | 6.02  | 7.32  | 6.03  | 5.69  | 3.83  | 4.88  |
| 18  | 40.49 | 46.88 | 44.64 | 19.59 | 20.36 | 19.41 | 5.28  | 5.69  | 6.08  | 8.32  | 8.84  | 8.09  |
| 20  | 46.21 | 49.59 | 45.87 | 15.2  | 18.22 | 14.77 | 5.92  | 5.21  | 6.12  | 6.5   | 5.15  | 6.92  |

| Day | Dd2 <sup>Dd2 crt</sup> |       |       |       |       |       | Dd2 <sup>Dd2 crt F145I</sup> |       |       |       |       |       |
|-----|------------------------|-------|-------|-------|-------|-------|------------------------------|-------|-------|-------|-------|-------|
| 0   | 50                     | 44.58 | 45.33 | 49.6  | 42.96 | 46.92 | 51.95                        | 50    | 53.95 | 50.83 | 45.45 | 52.99 |
| 2   | 56.67                  | 53.92 | 50.63 | 67.79 | 69.61 | 63.84 | 54.23                        | 52.43 | 55.84 | 36.36 | 34.03 | 34.3  |
| 5   | 74.6                   | 74.76 | 72.64 | 62.57 | 67.64 | 52.2  | 87.1                         | 88.06 | 87.78 | 52.32 | 51.26 | 48.68 |
| 7   | 71.5                   | 72.59 | 62.1  | 58.17 | 59.43 | 38.1  | 95.77                        | 96.29 | 94.47 | 69.81 | 67.73 | 65.15 |
| 9   | 47.9                   | 54.43 | 40.4  | 30.71 | 28.73 | 19.42 | 91.45                        | 92.25 | 91.29 | 65.5  | 61.49 | 60.16 |
| 12  | 35.63                  | 39.89 | 22.78 | 28.5  | 24.92 | 15.69 | 79.92                        | 78.83 | 82.06 | 54.88 | 55.17 | 54.39 |
| 14  | 34.97                  | 33.82 | 15.41 | 22.55 | 20.37 | 11.25 | 85.71                        | 87.71 | 92.03 | 62    | 57.24 | 56.72 |
| 16  | 31.34                  | 23.89 | 9.43  | 13.72 | 10.46 | 7.09  | 91.53                        | 92.34 | 92.12 | 66.67 | 64.41 | 71.11 |
| 18  | 25.43                  | 16.03 | 5.56  | 12.43 | 10.57 | 7.81  | 93.55                        | 95.2  | 94.19 | 79.82 | 81.98 | 80.02 |
| 20  | 20.03                  | 18.64 | 7.16  | 9.46  | 7.05  | 5.36  | 94.48                        | 95.47 | 94.94 | 89.67 | 89.16 | 91.2  |

| Day | Dd2 <sup>Dd2 crt M343L</sup> |       |       |       |       |       | Dd2 <sup>Dd2 crt G353V</sup> |       |       |       |       |       |
|-----|------------------------------|-------|-------|-------|-------|-------|------------------------------|-------|-------|-------|-------|-------|
| 0   | 38.33                        | 45.53 | 42.86 | 44.55 | 48.13 | 47.51 | 46.67                        | 44.35 | 55.21 | 49.5  | 48.73 | 47.92 |
| 2   | 46.94                        | 45.55 | 45.71 | 60.75 | 61.15 | 55.88 | 56.36                        | 55.43 | 57.95 | 66.59 | 70.69 | 68.82 |
| 5   | 75.72                        | 78.45 | 77.53 | 69.93 | 51.35 | 52.65 | 83.75                        | 83.58 | 80    | 68.83 | 69.23 | 70.69 |
| 7   | 68.09                        | 73.2  | 52.52 | 23.89 | 24.68 | 33.11 | 70.59                        | 74.07 | 71.87 | 68.67 | 70.78 | 69.62 |
| 9   | 14.85                        | 10.3  | 16.36 | 13.86 | 23.68 | 21.88 | 62.07                        | 70.18 | 69.76 | 54.23 | 54.85 | 52.98 |
| 12  | 14.29                        | 8.45  | 13.45 | 13.37 | 14.03 | 21.9  | 75                           | 74.26 | 70.37 | 64.12 | 62.92 | 60.58 |
| 14  | 6.99                         | 4.05  | 7.73  | 7.52  | 12.76 | 17.11 | 61.6                         | 71.31 | 70.39 | 67.28 | 66.15 | 66.24 |
| 16  | 3.64                         | 2.71  | 7.14  | 4.56  | 9.14  | 11.63 | 62.8                         | 68.13 | 71.65 | 64.85 | 67.16 | 66.41 |
| 18  | 2.46                         | 1.15  | 4.6   | 6.38  | 11.99 | 14.04 | 60.94                        | 67.33 | 65    | 67.13 | 73.17 | 72.21 |
| 20  | 2.17                         | 1.45  | 3.97  | 3.39  | 8.14  | 12.42 | 60.33                        | 70.86 | 73.27 | 65.78 | 68.87 | 60.77 |

| Day | PH1008-C (M343L) |       |       |       |       |       | PH1008-C <sup>Dd2 crt</sup> |       |       |       |       |       |
|-----|------------------|-------|-------|-------|-------|-------|-----------------------------|-------|-------|-------|-------|-------|
| 0   | 42.35            | 49.44 | 42.68 | 61.45 | 61.9  | 61.45 | 42.62                       | 50    | 38.35 | 48.72 | 47.18 | 44.62 |
| 2   | 63.68            | 66.74 | 67.39 | 81.27 | 79.77 | 84.35 | 53.18                       | 53.83 | 53.24 | 69.46 | 65.54 | 62.42 |
| 5   | 96.69            | 95.24 | 96.72 | 89.84 | 89.17 | 88.2  | 92.28                       | 91.95 | 92.75 | 54.75 | 55.54 | 52.65 |
| 7   | 95.9             | 95.78 | 95.36 | 92.31 | 90.77 | 91.24 | 66.38                       | 70.27 | 70.5  | 52.62 | 48.67 | 42.52 |
| 9   | 97.34            | 96.03 | 96.18 | 91.38 | 91.99 | 91.78 | 53.57                       | 55.35 | 56.06 | 58.35 | 54.55 | 41.85 |
| 12  | 99.02            | 98.26 | 96.36 | 95.17 | 94.78 | 96.84 | 48.5                        | 49.24 | 40.15 | 54.19 | 51.59 | 31.37 |
| 14  | 96.61            | 96.37 | 95.65 | 95.68 | 96.83 | 96.58 | 44.95                       | 42.94 | 30.59 | 54.65 | 51.14 | 26.96 |
| 16  | 89.47            | 95.28 | 95.58 | 89.84 | 92.03 | 94.11 | 46.78                       | 44.89 | 33.38 | 51.49 | 49.02 | 21.46 |
| 18  | 81.64            | 84.64 | 93.57 | 94.62 | 97.62 | 96.08 | 56.67                       | 54.42 | 32.07 | 52.09 | 46.27 | 26.11 |
| 20  | 94.75            | 94.22 | 97.45 | 91.81 | 93    | 93.37 | 45.09                       | 42.29 | 33.33 | 57.63 | 50.17 | 32.13 |

| Day | PH1263-C (H97Y) |       |       |       |       |       | PH1263-C <sup>Dd2 crt</sup> |       |       |       |       |       |
|-----|-----------------|-------|-------|-------|-------|-------|-----------------------------|-------|-------|-------|-------|-------|
| 0   | 54.1            | 44.44 | 48.98 | 52.63 | 46.67 | 48.94 | 52.14                       | 46.09 | 48.18 | 42.62 | 41.67 | 46.89 |
| 2   | 65.67           | 63.52 | 61.72 | 70.42 | 77.53 | 77.97 | 56.66                       | 56.99 | 56.57 | 68.65 | 65.67 | 66.02 |
| 5   | 95.48           | 98.2  | 96.69 | 84.85 | 88.45 | 90.17 | 96.15                       | 94.71 | 92.38 | 57.67 | 59.88 | 57.79 |
| 7   | 94.98           | 97.15 | 96.17 | 88.64 | 95.65 | 93.33 | 82.67                       | 68.62 | 73.38 | 57.13 | 61.3  | 56.65 |
| 9   | 95.76           | 96.97 | 97.92 | 91.15 | 91.8  | 91.33 | 53.15                       | 56.57 | 60.57 | 52.88 | 51.03 | 54.29 |
| 12  | 97.87           | 97.47 | 98.66 | 93.35 | 96.17 | 95.64 | 49.06                       | 52.08 | 56.41 | 55.04 | 59.48 | 59.61 |
| 14  | 94.34           | 95.06 | 96.15 | 95.32 | 95.58 | 95.9  | 41.06                       | 50.88 | 64.57 | 53.09 | 61.9  | 63.22 |
| 16  | 95.28           | 94.92 | 95.31 | 89.25 | 90.68 | 92.18 | 41.67                       | 53.18 | 66.88 | 52.54 | 57.72 | 55.4  |
| 18  | 94              | 93.57 | 90.11 | 95.79 | 96.88 | 96.89 | 47.44                       | 48.48 | 52.94 | 56.05 | 63.72 | 62.29 |
| 20  | 96.45           | 96.48 | 96.87 | 89.76 | 89.11 | 93.74 | 52.19                       | 61.9  | 52.66 | 63.36 | 65.76 | 65.02 |

Two independent experiments were performed in triplicate. The values listed are the % eGFP+ cells.

**Supplementary Table 13 | *pfpm2* copy number and RNA expression analysis.**

| Ratios <i>pfpm2</i> :<br>Pf $\beta$ -tubulin | qPCR (normalized by <i>pfB-tubulin</i> ) |      |                                           |   | RT-qPCR (normalized by <i>serine-tRNA ligase</i> ) |      |                                                                       |    |
|----------------------------------------------|------------------------------------------|------|-------------------------------------------|---|----------------------------------------------------|------|-----------------------------------------------------------------------|----|
|                                              | Mean                                     | SEM  | Calculated<br><i>pfpm2</i> copy<br>number | N | Mean RNA<br>expression<br>over 3D7<br>control      | SEM  | <i>pfpm2</i><br>expression in<br>edited line<br>over parental<br>line | N  |
| 1:1                                          | 0.93                                     | 0.04 | 1                                         | 3 | na                                                 | na   | na                                                                    | na |
| 2:1                                          | 2.22                                     | 0.05 | 2                                         | 3 | na                                                 | na   | na                                                                    | na |
| 3:1                                          | 2.91                                     | 0.04 | 3                                         | 3 | na                                                 | na   | na                                                                    | na |
| 4:1                                          | 3.97                                     | 0.10 | 4                                         | 3 | na                                                 | na   | na                                                                    | na |
| 5:1                                          | 4.19                                     | 0.08 | 5                                         | 3 | na                                                 | na   | na                                                                    | na |
| 3D7                                          | 1.00                                     | 0.00 | 1                                         | 3 | 1.00                                               | 0.00 | na                                                                    | 3  |
| GC03                                         | 1.02                                     | 0.04 | 1                                         | 3 | 1.33                                               | 0.08 | na                                                                    | 3  |
| Dd2                                          | 1.10                                     | 0.06 | 1                                         | 6 | 1.50                                               | 0.06 | na                                                                    | 3  |
| Dd2 <sup>Dd2 crt</sup>                       | 1.16                                     | 0.08 | 1                                         | 6 | 1.25                                               | 0.18 | 1.00                                                                  | 6  |
| Dd2 <sup>Dd2 crt F145I</sup>                 | 1.07                                     | 0.02 | 1                                         | 3 | 1.31                                               | 0.10 | 1.05                                                                  | 3  |
| Dd2 <sup>Dd2 crt M343L</sup>                 | 1.04                                     | 0.04 | 1                                         | 3 | 1.01                                               | 0.06 | 0.81                                                                  | 3  |
| Dd2 <sup>Dd2 crt G353V</sup>                 | 1.14                                     | 0.02 | 1                                         | 3 | 0.31 <sup>#</sup>                                  | 0.03 | 0.25 <sup>#</sup>                                                     | 3  |
| PH1008-C                                     | 3.02                                     | 0.06 | 3                                         | 6 | 2.59                                               | 0.20 | na                                                                    | 3  |
| PH1008-C <sup>Dd2 crt</sup>                  | 1.23                                     | 0.01 | 1                                         | 3 | 0.87                                               | 0.15 | 0.34                                                                  | 3  |
| PH1263-C                                     | 1.80                                     | 0.03 | 2                                         | 3 | 1.41                                               | 0.04 | na                                                                    | 3  |
| PH1263-C <sup>Dd2 crt</sup>                  | 0.79                                     | 0.02 | 1                                         | 3 | 0.51                                               | 0.03 | 0.36                                                                  | 3  |

*pfpm2* copy number and expression levels at the mid trophozoite stage (24 hours post-invasion) were determined using multiplexed Taqman assays (see Methods). na: not applicable. #: sample was collected earlier in early trophs and late rings when *pfpm2* expression is lower, hence change was not significant.



**Supplementary Table 14 | List of oligonucleotides used in this study.**

| Name | Nucleotide Sequence (5'–3')                         | Description                                                                | Lab Name | Purpose                                                             |
|------|-----------------------------------------------------|----------------------------------------------------------------------------|----------|---------------------------------------------------------------------|
| p1   | gctcctaggATGCATGGTTCGCTAAACTGC                      | <i>hdhfr</i> AvrII Forward                                                 | p4725    | Integration PCR #1. 2.5 kb                                          |
| p2   | TTGACCCCTATATATTCCACCCA                             | <i>pfcr1</i> 3' UTR (+1285-1308)                                           | p5688    | yes/no integration at 3' end                                        |
| p3   | GACCTTAACAGATGGCTCAC                                | <i>pfcr1</i> exon 2 EcoRI Forward                                          | p3264    | Integration PCR #2. 0.4 kb (0.6                                     |
| p4   | cttatcgataAAGCAGAAGAACATATTAATAG<br>GAATACTTAATTG   | <i>pfcr1</i> exon 3 ClaI Reverse                                           | p3265    | kb if unedited due to additional<br>intron 2). Sequences exons 2-3. |
| p5   | cttgggCCCAAGTTGTAAGTCTTAAGC                         | <i>pfcr1</i> 5' UTR (-494-517) ApaI<br>Forward                             | p3404    | Integration PCR #3. 2 kb.                                           |
| p6   | aaccatggatTTATTGTGTAATAATTGAATC<br>GACG             | <i>pfcr1</i> exon 13 Reverse                                               | p1640    | Sequence entire edited locus.                                       |
| p7   | CCGTTAATAATAAATACACGCAG                             | <i>pfcr1</i> 5'UTR sense                                                   | p4233    | Sequencing primer for <i>pfcr1</i><br>(along with p3, p6).          |
| p9   | GTTTTGTAACATCCGAAACTTACAACCTT<br>ATTTGTATGATTATGTTT | PfCRT H97Y sense SDM.<br>CAC to TAC.                                       | p5345    | PfCRT H97Y SDM                                                      |
| p10  | GAACATAATCATACAAATAAAGTTGTGA<br>GTTTCGGATGTTACAAAAC | PfCRT H97Y antisense<br>SDM. CAC to TAC.                                   | p5346    |                                                                     |
| p11  | CCTGTTTCAGTCATTTTGGCCATCATAGG<br>TCTTACAAGAAGTAC    | PfCRT F145I sense SDM.<br>TTC to ATC.                                      | p6016    | PfCRT F145I SDM                                                     |
| p12  | GTAGTTCTTGTAAAGACCTATGATGGCCA<br>AAATGACTGAACAGG    | PfCRT F145I antisense<br>SDM. TTC to ATC.                                  | p6017    |                                                                     |
| p13  | CGACAAATTTTCTACCTTGACATATACTA<br>TTGTTAGTTG         | PfCRT M343L sense SDM.<br>ATG to TTG.                                      | p5343    | PfCRT M343L SDM                                                     |
| p14  | CAACTAACAAATAGTATATGTCAAGGTAG<br>AAAATTTGTCG        | PfCRT M343L antisense<br>SDM. ATG to TTG.                                  | p5344    |                                                                     |
| p15  | CTATTGTTAGTTGTATACAAGTCCAGCA<br>ACAGCAATTG          | PfCRT G353V sense SDM.<br>GGT to GTT.                                      | p5330    | PfCRT G353V SDM                                                     |
| p16  | CAATTGCTGTTGCTGGACTTGTATACA<br>ACTAACAAATAG         | PfCRT G353V antisense<br>SDM. GGT to GTT.                                  | p5331    |                                                                     |
| p17  | TGATGTGCGCAAGTGATCC                                 | Pf $\beta$ -tubulin sense qPCR<br>primer                                   | p5856    | Pf $\beta$ -tubulin qPCR                                            |
| p18  | TCCTTTGTGGACATTCTTCCTC                              | Pf $\beta$ -tubulin antisense qPCR<br>primer                               | p5957    |                                                                     |
| p19  | HEX-<br>TAGCACATGCCGTTAAATATCTTCCATG<br>TCT-BHQ     | Pf $\beta$ -tubulin HEX and Black<br>Hole Quencher dual-labeled<br>probe   | p5851    |                                                                     |
| p20  | GGATTGCAACCAACTTATACTGC                             | Pf Plasmepsin 2 sense<br>qPCR primer                                       | p6758    | Pf Plasmepsin 2 qPCR                                                |
| p21  | AATTGGATCTACTGAACCTATTGATAA                         | Pf Plasmepsin 2 antisense<br>qPCR primer                                   | p6759    |                                                                     |
| p22  | FAM-<br>CAACATTTGATGGTATCCTTGGTTTAGG<br>ATGGA-MGB   | Pf Plasmepsin 2 FAM and<br>MGB dual-labeled probe                          | p6760    |                                                                     |
| p23  | TGGAACAATGGTAGCTGCAC                                | Pf serine tRNA ligase sense<br>qPCR primer                                 | p6755    | Pf serine tRNA ligase qPCR                                          |
| p24  | GGCGCAATTTTTCAGGAACT                                | Pf serine tRNA ligase<br>antisense qPCR primer                             | p6756    |                                                                     |
| p25  | HEX-<br>TGTCTTCTTGAAAATTATCAAACGGCG<br>AAGG-BHQ     | Pf serine tRNA ligase HEX<br>and Black Hole Quencher<br>dual-labeled probe | p6757    |                                                                     |

Lower-case nucleotides are not present in the template (restriction sites, modifying primer annealing temperature, or site-directed mutagenesis (SDM)).
